# Supplementary material for: Revisiting Schizophrenia Linkage Data in the NIMH Repository: Reanalysis of Regularized Data Across Multiple Studies
Source: Atypon-hosted journal article supplement (doi:10.1176/appi.ajp.2013.11121766), 2013-10-30
Supplement: 350.SA2.pdf [file 350.SA2.pdf]

## PHENOTYPE PROCESSING METHODS.

We first applied exclusionary criteria, recoding diagnosed individuals as phenotype “unknown” in the presence of: all dementias, amnesic and cognitive disorders; unknown/unspecified or deferred diagnoses on Axis I; and substance-related disorders that have been linked to schizophrenia or that cause ancillary psychiatric symptoms. Also set to “unknown” were individuals with Major Depressive or Bipolar Disorder coded as either “severe, with psychotic features” or “severity unknown.” (A complete list of corresponding DSM-III-R and DSM-IV codes is listed below, along with our final diagnostic algorithm.) Remaining schizophrenia cases, coded as “affected,” were divided into two levels: (i) Schizophrenia (Disorganized, Catatonic, Paranoid, and Residual types of Schizophrenia Disorder); and (ii) Schizophrenia/Affective (Schizoaffective Disorder or any Schizophrenia Disorder and a significant Affective Disorder). Schizophrenia individuals with comorbid diagnoses of Recurrent Major Depressive or Bipolar Disorder were recoded as Schizophrenia/Affective in order to account for the affective presentation while taking into consideration diagnostic uncertainty due to lack of temporal data. We also classified as Broad Spectrum anyone meeting criteria for a Delusional Disorder, Brief Psychotic Disorder, Psychotic Disorder NOS, Schizophreniform Disorder, or Cluster A Personality Disorder. Because we would expect more variability in the diagnosis of individuals with broad spectrum rather than clear-cut core schizophrenia, Broad Spectrum subjects were recoded to “unknown;” only 187 individuals (< 7% of affected individuals) fell in this category. Individuals assigned a diagnosis of Bipolar I or II Disorder NOS, Mood Disorder NOS, Depressive Disorder NOS, Personality Disorder NOS, or Diagnosis Deferred on Axis II, were coded as “unknown.” Finally, individuals with a clinical assessment who did not meet criteria for Schizophrenia, Schizophrenia/Affective, or Broad Spectrum and who also did not have any of the exclusionary diagnoses were coded as “unaffected.”

DSMIIIR

[SZ\_CODES]

295.10 Schizophrenia, disorganized type, unspecified  
295.12 Schizophrenia, disorganized type, chronic  
295.22 Schizophrenia, catatonic type, chronic  
295.30 Schizophrenia, paranoid type, unspecified  
295.32 Schizophrenia, paranoid type, chronic  
295.60 Schizophrenia, residual type, unspecified  
295.62 Schizophrenia, residual type, chronic  
295.90 Schizophrenia, undifferentiated type, unspecified  
295.92 Schizophrenia, undifferentiated type, chronic  
295.34 Schizophrenia, paranoid type, chronic with acute exacerbation  
295.35 Schizophrenia, paranoid type, in remission

[SA\_CODES]

295.70 Schizoaffective disorder  
295.70D Schizoaffective disorder, depression type  
295.70M Schizoaffective disorder, manic type

[BS\_CODES]

295.40 Schizophreniform disorder  
297.10 Delusional disorder  
298.90 Psychotic disorder NOS  
301.00 Paranoid personality disorder  
301.20 Schizoid personality disorder  
301.22 Schizotypal personality disorder

[GLOBAL\_EXCLUDE]

60 Dx Unknown  
61 Un Dx Psychosis  
62 Un Dx Psychosis, w/ hospitalization  
63 Un Dx Psychiatric Disorder w/o hospitalization  
290.10 Presenile dementia NOS OR Primary degenerative dementia of the Alzheimer type, presenile onset, uncomplicated  
290.40 Multi-infarct dementia, uncomplicated  
291.20 Dementia associated with alcoholism  
292.12 Other or unspecified psychoactive substance hallucinosis  
293.00 Delirium (etiology noted on Axis III or is unknown)  
293.81 Organic delusional disorder (etiology noted on Axis III or is unknown)

293.82 Organic hallucinosis (etiology noted on Axis III or is unknown)  
293.83 Organic mood disorder (etiology noted on Axis III or is unknown)  
294.10 Dementia (etiology noted on Axis III or is unknown)  
296.20 Major depression, single episode, unspecified  
296.24 Major depression, single episode, with psychotic features  
296.30 Major depression, recurrent, unspecified  
296.34 Major depression, recurrent, with psychotic features  
296.40 Bipolar disorder, manic, unspecified  
296.44 Bipolar disorder, manic, with psychotic features  
296.60 Bipolar disorder, mixed, unspecified  
296.64 Bipolar disorder, mixed, with psychotic features  
299.80 Pervasive developmental disorder NOS  
300.90 Unspecified mental disorder (nonpsychotic)  
304.00 Opioid dependence  
304.10 Sedative, hypnotic, or anxiolytic dependence  
304.20 Cocaine dependence  
304.40 Amphetamine or similarly acting sympathomimetic dependence  
304.50 Hallucinogen dependence OR Phencyclidine (PCP) or similarly acting arylcyclohexylamine  
dependence  
304.60 Inhalant dependence  
304.90 Polysubstance dependence OR Psychoactive substance dependence NOS  
305.30 Hallucinogen abuse OR Hallucinogen hallucinosis  
305.40 Sedative, hypnotic, or anxiolytic abuse OR Sedative, hypnotic, or anxiolytic intoxication  
305.50 Opioid abuse OR Opioid intoxication  
305.60 Cocaine abuse OR Cocaine intoxication  
305.70 Amphetamine or similarly acting sympathomimetic abuse OR Amphetamine or similarly acting  
sympathomimetic intoxication  
310.10 Organic personality disorder (etiology noted on Axis III or is unknown)  
317.00 Mild mental retardation  
318.00 Moderate mental retardation  
319.00 Unspecified mental retardation  
555.00 Any other diagnosis  
290.00A Senile dementia NOS  
290.00B Primary degenerative dementia of the Alzheimer type, senile onset, uncomplicated  
292.00F Amphetamine or similarly acting sympathomimetic withdrawal  
292.11C Other or unspecified psychoactive substance delusional disorder  
292.11D Hallucinogen delusional disorder  
292.84A Hallucinogen mood disorder  
292.84B Other or unspecified psychoactive substance mood disorder  
294.80A Organic mental disorder NOS (etiology noted on Axis III or is unknown)  
296.24C Major depression, single episode, with psychotic features, mood congruent  
296.24I Major depression, single episode, with psychotic features, mood incongruent  
296.34C Major depression, recurrent, with psychotic features, mood congruent

296.34I Major depression, recurrent, with psychotic features, mood incongruent  
296.44C Bipolar disorder, manic, with psychotic features, mood congruent  
296.44I Bipolar disorder, manic, with psychotic features, mood incongruent  
304.50A Hallucinogen dependence  
304.50B Phencyclidine (PCP) or similarly acting arylcyclohexylamine dependence  
304.90A Polysubstance dependence  
304.90B Psychoactive substance dependence NOS  
305.30A Hallucinogen hallucinosis  
305.30B Hallucinogen Abuse/Dep.  
305.40A Sedative, hypnotic, or anxiolytic abuse  
305.50A Opioid abuse  
305.50B Opioid intoxication  
305.60A Cocaine abuse  
305.70B Amphetamine or similarly acting sympathomimetic abuse  
305.90A Phencyclidine (PCP) or similarly acting arylcyclohexylamine abuse  
305.90C Inhalant abuse  
305.90D Psychoactive substance abuse NOS  
305.90E Other or unspecified psychoactive substance intoxication  
305.90G Inhalant intoxication  
315.90A Development disorder NOS  
799.90B Diagnosis or condition deferred on Axis I  
V40.00 Borderline intellectual functioning

[UNAFF\_EXCLUDE]

296.89 Bipolar II Disorder  
296.90 Mood Disorder NOS  
301.90 Personality disorder NOS  
311.00 Depressive disorder NOS  
296.70A Bipolar disorder, NOS  
799.90A Diagnosis or condition deferred on Axis II

[SZ\_EXCLUDE]

[SZ\_DEMOTE1]

296.31 Major depression, recurrent, mild  
296.32 Major depression, recurrent, moderate  
296.33 Major depression, recurrent, severe, without psychotic features  
296.35 Major depression, recurrent, in partial remission  
296.36 Major depression, recurrent, in full remission  
296.52 Bipolar disorder, depressed, moderate

296.55 Bipolar disorder, depressed, in partial remission  
296.89 Bipolar II Disorder  
296.90 Mood Disorder NOS  
311.00 Depressive disorder NOS  
296.70A Bipolar disorder, NOS

[SZ\_DEMOTE2]

[SA\_EXCLUDE]

[SA\_DEMOTE]

[BS\_EXCLUDE]

DSMIV

[SZ\_CODES]

295.00 Schizophrenia, unspecified  
295.10 Schizophrenia, Disorganized Type  
295.20 Schizophrenia, Catatonic Type  
295.30 Schizophrenia, Paranoid Type  
295.60 Schizophrenia, Residual Type  
295.90 Schizophrenia, Undifferentiated Type  
295.92 Schizophrenia, undifferentiated type, chronic

[SA\_CODES]

295.70 Schizoaffective Disorder  
295.70D Schizoaffective disorder, depressive type  
295.70M Schizoaffective disorder, bipolar type

[BS\_CODES]

295.40 Schizophreniform Disorder  
298.8 Brief Psychotic Disorder  
298.9 Psychotic Disorder NOS  
301.0 Paranoid Personality Disorder  
301.20 Schizoid Personality Disorder  
301.22 Schizotypal Personality Disorder  
297.10/298 Delusional Disorder/Psychotic Disorder  
297.1 Delusional Disorder

[GLOBAL\_EXCLUDE]

290.0 Dementia of the Alzheimer's Type, With Late Onset, Uncomplicated (DSMIV)  
291.2 Alcohol-Induced Persisting Dementia  
291.3 Alcohol-Induced Psychotic Disorder, With Hallucinations  
291.5 Alcohol-Induced Psychotic Disorder, With Delusions  
291.9 Alcohol-Related Disorder NOS  
292.11 Amphetamine-Induced Psychotic Disorder, With Delusions OR Cannabis-Induced Psychotic Disorder, With Delusions OR Cocaine-Induced Psychotic Disorder, With Delusions OR Hallucinogen-Induced Psychotic Disorder, With Delusions OR Inhalant-Induced Psychotic Disorder, With Delusions OR Opioid-Induced Psychotic Disorder, With Delusions OR Other (or Unknown) Substance-Induced Psychotic Disorder, With Delusions OR Phencyclidine-Induced Psychotic Disorder, With Delusions OR Sedative-, Hypnotic-, or Anxiolytic-Induced Psychotic Disorder, With Delusions  
292.89 Amphetamine-Induced Anxiety Disorder OR Amphetamine-Induced Sexual Dysfunction OR Amphetamine-Induced Sleep Disorder OR Amphetamine Intoxication OR Caffeine-Induced Anxiety Disorder OR

Caffeine-Induced Sleep Disorder OR Cannabis-Induced Anxiety Disorder OR Cannabis Intoxication OR Cocaine-Induced Anxiety Disorder OR Cocaine-Induced Sexual Dysfunction OR Cocaine-Induced Sleep Disorder OR Cocaine Intoxication OR Hallucinogen-Induced Anxiety Disorder OR Hallucinogen Intoxication OR Hallucinogen Persisting Perception Disorder OR Inhalant-Induced Anxiety Disorder OR Inhalant Intoxication OR Opioid-Induced Sexual Dysfunction OR Opioid-Induced Sleep Disorder OR Opioid Intoxication OR Other (or Unknown) Substance-Induced Anxiety Disorder OR Other (or Unknown) Substance-Induced Sexual Dysfunction OR Other (or Unknown) Substance-Induced Sleep Disorder OR Other (or Unknown) Substance Intoxication OR Phencyclidine-Induced Anxiety Disorder OR Phencyclidine Intoxication OR Sedative-, Hypnotic-, or Anxiolytic-Induced Anxiety Disorder OR Sedative-, Hypnotic-, or Anxiolytic-Induced Sexual Dysfunction OR Sedative-, Hypnotic-, or Anxiolytic-Induced Sleep Disorder OR Sedative, Hypnotic, or Anxiolytic Intoxication

293.81 Psychotic Disorder Due to ... [Indicate the General Medical Condition], With Delusions  
293.82 Psychotic Disorder Due to ... [Indicate the General Medical Condition], With Hallucinations  
293.83 Mood Disorder Due to ... [Indicate the General Medical Condition]  
293.9 Mental Disorder NOS Due to ... [Indicate the General Medical Condition]  
294.1 Dementia Due to ... [Indicate the General Medical Condition] (DSMIV)  
294.8 Amnestic Disorder NOS OR Dementia NOS  
296.00 Bipolar I Disorder, Single Manic Episode, Unspecified  
296.04 Bipolar I Disorder, Single Manic Episode, Severe With Psychotic Features  
296.20 Major Depressive Disorder, Single Episode, Unspecified  
296.24 Major Depressive Disorder, Single Episode, Severe With Psychotic Features  
296.30 Major Depressive Disorder, Recurrent, Unspecified  
296.34 Major Depressive Disorder, Recurrent, Severe With Psychotic Features  
296.44 Bipolar I Disorder, Most Recent Episode Manic, Severe With Psychotic Features  
296.54 Bipolar I Disorder, Most Recent Episode Depressed, Severe With Psychotic Features  
296.60 Bipolar I Disorder, Most Recent Episode Mixed, Unspecified  
296.64 Bipolar I Disorder, Most Recent Episode Mixed, Severe With Psychotic Features  
296.7 Bipolar I Disorder, Most Recent Episode Unspecified  
300.9 Unspecified Mental Disorder (nonpsychotic)  
304.00 Opioid Dependence  
304.10 Sedative, Hypnotic, or Anxiolytic Dependence  
304.20 Cocaine Dependence  
304.40 Amphetamine Dependence  
304.50 Hallucinogen Dependence  
304.60 Inhalant Dependence (DSMIV) OR Inhalant Dependence OR Phencyclidine Dependence (DSMIVTR)  
304.80 Polysubstance Dependence  
305.30 Hallucinogen Abuse  
305.40 Sedative, Hypnotic, or Anxiolytic Abuse  
305.50 Opioid Abuse  
305.60 Cocaine Abuse  
305.70 Amphetamine Abuse  
305.90 Caffeine Intoxication OR Inhalant Abuse OR Other (or Unknown) Substance Abuse OR Phencyclidine Abuse

315.9 Learning Disorder NOS  
317 Mild Mental Retardation  
318.0 Moderate Mental Retardation  
318.1 Severe Mental Retardation  
319 Mental Retardation, Severity Unspecified  
555.00 Any other diagnosis  
799.9 Diagnosis Deferred on Axis II OR Diagnosis or Condition Deferred on Axis I  
290.10A Dementia due to Creutzfeldt-Jakob disease  
290.10C Dementia of the Alzheimer's type, with early onset, uncomplicated  
291.8B Alcohol-induced mood disorder  
292.11A Amphetamine-induced psychotic disorder, with delusions  
292.11G Other (or unknown) substance-induced psychotic disorder, with delusions  
292.12A Amphetamine-induced psychotic disorder, with hallucinations  
292.12B "Cannabis-induced psychotic disorder, with hallucinations"  
292.12C Cocaine-induced psychotic disorder, with hallucinations  
292.12G Other (or unknown) substance-induced psychotic disorder, with hallucinations  
292.84B Cocaine-induced mood disorder  
292.84F Other (or unknown) substance-induced mood disorder  
292.9I Other (or unknown) substance-related disorder NOS  
293.89B Catatonic disorder due to [Indicate the general medical condition]  
294.8B Dementia NOS  
294.9A Cognitive disorder NOS  
294.9B Dementia due to HIV disease  
296.34C Major Depressive Disorder, Recurrent, Severe With Psychotic Features, Mood Congruent  
296.34I Major Depressive Disorder, Recurrent, Severe With Psychotic Features, Mood Incongruent  
296.40A Bipolar I disorder, most recent episode hypomanic  
296.40B Bipolar I disorder, most recent episode manic, unspecified  
296.74C Bipolar I Disorder, Most Recent Episode Unspecified, Severe With Psychotic Features, Mood  
Congruent  
296.74I Bipolar I Disorder, Most Recent Episode Unspecified, Severe With Psychotic Features, Mood  
Incongruent  
299.80B Pervasive developmental disorder NOS  
304.90A Other (or unknown) substance dependence  
304.90B Phencyclidine dependence  
304.xx/305 Other (or Unknown) Substance Dependence/Alcohol Abuse  
305.90B Inhalant abuse  
305.90C Other (or unknown) substance abuse  
305.90D Phencyclidine abuse  
799.9B Diagnosis or condition deferred on Axis I  
V62.89 Borderline Intellectual Functioning OR Phase of Life Problem OR Religious or Spiritual  
Problem  
V62.89A Borderline intellectual functioning



[UNAFF\_EXCLUDE]

296.80 Bipolar Disorder NOS  
296.89 Bipolar II Disorder  
296.90 Mood Disorder NOS  
301.9 Personality Disorder NOS  
311 Depressive Disorder NOS  
799.9A Diagnosis deferred on Axis II

[SZ\_EXCLUDE]

[SZ\_DEMOTE1]

296.02 Bipolar I Disorder, Single Manic Episode, Moderate  
296.31 Major Depressive Disorder, Recurrent, Mild  
296.32 Major Depressive Disorder, Recurrent, Moderate  
296.33 Major Depressive Disorder, Recurrent, Severe Without Psychotic Features  
296.35 Major Depressive Disorder, Recurrent, In Partial Remission  
296.36 Major Depressive Disorder, Recurrent, In Full Remission  
296.41 Bipolar I Disorder, Most Recent Episode Manic, Mild  
296.46 Most Recent Episode Manic, In Full Remission  
296.52 Bipolar I Disorder, Most Recent Episode Depressed, Moderate  
296.55 Bipolar I Disorder, Most Recent Episode Depressed, In Partial Remission  
296.56 Bipolar I Disorder, Most Recent Episode Depressed, In Full Remission  
296.80 Bipolar Disorder NOS  
296.89 Bipolar II Disorder  
296.90 Mood Disorder NOS  
311 Depressive Disorder NOS

[SZ\_DEMOTE2]

[SA\_EXCLUDE]

[SA\_DEMOTE]

[BS\_EXCLUDE]

### Diagnostic Algorithm for CAPS-pheno Data

| SZ    | SA    | BS      | Classification          | Diagnosis | Diagnosis used in analysis |
|-------|-------|---------|-------------------------|-----------|----------------------------|
| 2     | [0,1] | [0,1,2] | Schizophrenia           | 4         | Affected                   |
| [0,1] | 2     | [0,1,2] | Schizophrenia/Affective | 3         | Affected                   |
| [0,1] | [0,1] | 2       | Broad Spectrum          | 2         | Unknown                    |
| 1     | 1     | 1       | Unaffected              | 1         | Unaffected                 |
| 0     | 0     | 0       | Unknown                 | 0         | Unknown                    |
