# Supplementary material for: Revisiting Schizophrenia Linkage Data in the NIMH Repository: Reanalysis of Regularized Data Across Multiple Studies
Source: Atypon-hosted journal article supplement (doi:10.1176/appi.ajp.2013.11121766), 2013-10-30
Supplement: 350.ST2.pdf [file 350.ST2.pdf]

| <b>Data Set</b>                  | <b># Schizophrenia Families</b> | <b># Schizophrenia/Affective Families</b> | <b>TOTAL</b> |
|----------------------------------|---------------------------------|-------------------------------------------|--------------|
| <b>Study 1 African American</b>  | 12                              | (--) <sup>(1)</sup>                       | <b>16</b>    |
| <b>Study 1 European American</b> | 7                               | (--) <sup>(2)</sup>                       | <b>19</b>    |
| <b>Study 2 African American</b>  | 59                              | 26 <sup>(1)</sup>                         | <b>81</b>    |
| <b>Study 2 European American</b> | 92                              | 62 <sup>(2)</sup>                         | <b>142</b>   |
| <b>Study 3 Han Chinese</b>       | 476                             | 7                                         | <b>483</b>   |
| <b>Study 4 European American</b> | 18                              | 8                                         | <b>26</b>    |
| <b>Study 5 Hispanic</b>          | 50                              | 15                                        | <b>65</b>    |
| <b>Study 6 Hispanic</b>          | 67                              | 29                                        | <b>96</b>    |
| <b>Study 7 African American</b>  | 20                              | 22                                        | <b>42</b>    |
| <b>TOTAL</b>                     | <b>801</b>                      | <b>169</b>                                | <b>970</b>   |

<sup>(1)</sup> 4 African American families from Study 1 were merged with 22 from Study 2 for analysis.

<sup>(2)</sup> 12 European American families from Study 1 were merged with 92 from Study 2 for analysis.
